# Supplementary material for: Autophagy Is Polarized toward Cell Front during Migration and Spatially Perturbed by Oncogenic Ras
Source: Cells. 2021 Oct 2;10(10):2637. doi: 10.3390/cells10102637 (PMC8534269; doi:10.3390/cells10102637)
Supplement: Supplementary file 1 [file cells-10-02637-s001.zip]

Archive with 5 entries (5 files):
- Movie1_normal.avi
- Movie2_Ras.avi
- Movie3_Composite_normal.gif
- Movie4_Composite_Ras.gif
- Supplementary material_rv10-1008.pdf
